1 **Aluminum exposure impacts brain plasticity and behavior in Atlantic salmon**

2 (*Salmo salar*)

3 C. Grassie<sup>1\*</sup>, V.A. Braithwaite<sup>1</sup>, J. Nilsson<sup>2</sup>, T.O. Nilsen<sup>3,4</sup>, H-C. Teien<sup>5</sup>, S.O.

4 Handeland<sup>3</sup>, S.O. Stefansson<sup>4</sup>, V. Tronci<sup>3</sup>, M. Gorissen<sup>6</sup>, G. Flik<sup>6</sup> & L.O.E. Ebbesson<sup>3</sup>

5

6 <sup>1</sup> *Department of Ecosystem Science & Management, The Pennsylvania State University,*  
7 *University Park, PA 16802, USA*

8 <sup>2</sup> *Institute of Marine Research, P.O. Box 1870 Nordnes, N-5817 Bergen, Norway*

9 <sup>3</sup> *Uni Research AS, 5006 Bergen, Norway*

10 <sup>4</sup> *Department of Biology, University of Bergen, P.O. Box 7800, N-5020 Bergen, Norway*

11 <sup>5</sup> *Norwegian University of Life Science, Department of Plant and Environmental*  
12 *Sciences, Box 5003, 1432 Ås, Norway*

13 <sup>6</sup> *Department of Animal Physiology, Institute for Water and Wetland Research, Radboud*  
14 *University Nijmegen, Heyendaalseweg 135, 6525 AJ Nijmegen, The Netherlands*

15

16 \* Corresponding author: C. Grassie (+1 814-933-2788, ocg102@psu.edu)

17 **Summary**

18 Aluminum (Al) toxicity occurs frequently in natural aquatic ecosystems as a result of  
19 acid deposition and natural weathering processes. Detrimental effects of Al toxicity on  
20 aquatic organisms are well known and can have consequences for survival. Fish exposed  
21 to Al in low pH waters will experience physiological and neuroendocrine changes that  
22 disrupt homeostasis and alter behavior. To investigate the effects of Al exposure to both  
23 brain and behavior, Atlantic salmon (*Salmo salar*) kept in water treated with Al (pH 5.7,  
24  $0.37 \pm 0.04 \mu\text{mol l}^{-1}$  of Al) for 2 weeks were compared to fish kept in a control condition  
25 (pH 6.7,  $<0.04 \mu\text{mol l}^{-1}$  of Al). Fish exposed to Al and acidic conditions had increased Al  
26 accumulation in the gills and decreased gill  $\text{Na}^+$ ,  $\text{K}^+$ -ATPase activity, which impaired  
27 osmoregulatory capacity and caused physiological stress, indicated by elevated plasma  
28 cortisol and glucose levels. Here we show for the first time that exposure to Al in acidic  
29 conditions also impaired learning performance in a maze task. Al toxicity also reduced  
30 the expression of NeuroD1 transcript levels in the forebrain of exposed fish. As in  
31 mammals, these data show that exposure to chronic stress, such as acidified Al, can  
32 reduce neural plasticity during behavioral challenges in salmon, and may impair coping  
33 ability to new environments.

34

35 Keywords: parr-smolt transformation; telencephalon; salmonid; spatial learning;  
36 chronic mild stress; physiology

37

## 38 **1. Introduction**

39 Acid deposition causes acidification of many aquatic habitats worldwide;  
40 furthermore, it can cause aluminum (Al) toxicity through mobilization of Al from  
41 surrounding soil into adjacent waterways (Schindler, 1988). In water, Al can be present in  
42 different physico-chemical forms, but it is well established that Al cations are the  
43 bioavailable and toxic forms of Al, and that Al associated with organic material such as  
44 humic substances are less toxic (Gensemer and Playle, 1999; Teien *et al.*, 2006). Many  
45 aquatic organisms are sensitive to such changes in water quality, and the detrimental  
46 effects of Al in acidified water have been studied in plants (Lovett *et al.*, 2009),  
47 invertebrates (Guerold *et al.*, 2000), amphibians (Brady and Griffiths, 1995) and fish  
48 (Kroglund *et al.*, 2008; Poléo *et al.*, 1997). Thus Al toxicity has significant, negative  
49 implications for the biodiversity and functioning of many ecosystems (Horne and  
50 Dunson, 1995; Lovett *et al.*, 2009). To effectively manage aquatic habitats threatened by  
51 acid precipitation and resulting Al pollution, it is necessary to identify and understand  
52 how different species are affected (Dudgeon *et al.*, 2006).

53 Teleostean fishes, similar to other vertebrates, react to changes in the environment  
54 through the stress response; a series of behavioral and physiological adjustments  
55 mediated by a number of neuroendocrine pathways (Barton, 2002). In fish, the combined  
56 effects of acidified water and Al toxicity produces physiological changes such as  
57 disruption of gas and ion transport, altered blood chemistry and hormonal imbalance  
58 (Camargo *et al.*, 2009; Neff *et al.*, 2009; Nilsen *et al.*, 2010). Such physiological changes  
59 can disrupt behaviors like foraging and competition (Øverli *et al.*, 2006; Sørensen *et al.*,  
60 2007), and can have consequences for growth and survival (Biro *et al.* 2007).

61 Atlantic salmon (*Salmo salar* L.) is an important recreational and commercial species  
62 found on both sides of the Atlantic Ocean, but over the past few decades many wild  
63 populations have experienced a significant decline (Parrish *et al.*, 1998). Al toxicity in  
64 acidified water has been identified as a major contributor to this decrease (Kroglund *et*  
65 *al.*, 2007; McCormick *et al.*, 2009). An increase in Al concentration in water has been  
66 linked to an increase in Al accumulation in the gills (Kroglund *et al.*, 2008). Al is known  
67 to affect the function of the gills in both parr and smolts, but there appears to be increased  
68 sensitivity to this chemical stress in smolts (Monette and McCormick, 2008). This effect  
69 is likely due to enhanced stress responsiveness, often seen as elevated plasma glucose and  
70 cortisol levels, as the fish adapt to seawater (Monette and McCormick, 2008, Monette *et*  
71 *al.*, 2010). One way in which exposure to Al toxicity can hinder adaptation is through the  
72 loss of ion regulatory ability brought about by a decrease in gill Na<sup>+</sup>, K<sup>+</sup>-ATPase (NKA)  
73 activity, an enzyme required for seawater tolerance (Nilsen *et al.*, 2010). The negative  
74 influences of Al on ion secretion during smoltification may therefore contribute to  
75 decreased survival in salmon at sea.

76 In addition to physiological adaptations associated with smoltification, the brain  
77 undergoes major structural and chemical changes. These arise because of the  
78 neuroendocrine and behavioral changes associated with olfactory imprinting that are  
79 essential for migration to the ocean and return to their natal streams (Ebbesson *et al.*,  
80 1996a,b, 2003, 2007, 2011; Stefansson *et al.*, 2008). The physiological effects of stress  
81 also have an impact on behavior, through modification or impairment of signaling  
82 pathways that control behaviors such as feeding and aggression (Barton, 2002). During  
83 the critical smolting phase, Atlantic salmon have to adapt their behavior to cope with the

84 transition from fresh water to the marine environment, and an additional stress imposed  
85 by AI toxicity could impair their ability to adapt to this transition successfully. Since  
86 behavioral changes are mediated by chemical pathways in the brain, exposure to a  
87 stressor will likely affect the organization or properties of specific neural circuitry that  
88 produce behavior (Kolb *et al.*, 2003). Neurogenic differentiation factor (NeuroD) is a  
89 member of the family of proneural genes that regulates and controls neural differentiation  
90 (Kiefer, 2005). Neurogenesis, which includes proliferation, migration, differentiation and  
91 survival of neurons, is an integral step in learning and memory that is modulated by stress  
92 (Banasr and Dumas, 2007). NeuroD protein and mRNA have been used as neural  
93 differentiation markers in vertebrates (see Dufton *et al.* 2005) including fish (Mueller and  
94 Wullimann 2002, 2003). Therefore, stress-induced changes in learning could be linked to  
95 modifications in neurogenesis through differential expression of NeuroD. As in zebrafish,  
96 it is possible that salmon possess multiple NeuroD transcription factors, so for the  
97 purposes of this study we investigated changes in the expression of one specific NeuroD  
98 transcription factor, NeuroD1 (Liao *et al.* 1999).

99       Several behaviors that influence how animals make decisions are underpinned by  
100 cognition; a process that spans the way an animal perceives current information,  
101 internalizes this and then uses learning and memory processes to determine which  
102 behavioral response is most appropriate (Shettleworth, 2010). Learning and memory  
103 processes help to support navigation, which is an important behavior for many fish  
104 species (Braithwaite and de Perera, 2006; Odling-Smee *et al.*, 2008). As juveniles,  
105 Atlantic salmon need to be able to find their way around their river, as smolts they need  
106 to migrate to sea and then, after many months at sea, as adults they return to their natal

107 river or stream to spawn (Braithwaite and de Perera, 2006; Hansen *et al.*, 1993). To be  
108 able to complete these different kinds of navigation, salmon need to learn and remember  
109 different aspects of their environment. If exposure to Al in acidified water impairs  
110 cognitive capacity, this will likely affect the survival of these fish.

111 The current study was designed to test the effects of chronic exposure to Al in  
112 acidified water on Atlantic salmon. Al concentration in the gills was determined to  
113 document Al exposure. Plasma glucose and cortisol levels were measured to assess  
114 physiological stress. We measured gill NKA activity to assess the physiological effect of  
115 the treatment, as Al toxicity is known to reduce NKA activity in salmon smolts (Monette  
116 and McCormick, 2008; Nilsen *et al.* 2010). A simple maze task was used to investigate  
117 whether Al exposure affects cognitive ability. We predicted that exposure to an Al-  
118 enriched environment would have a negative impact on learning through decreased  
119 accuracy in a spatial task. Finally, to investigate potential changes within the brain, we  
120 measured neural plasticity through expression of the transcription factor NeuroD in the  
121 telencephalon.

122

## 123 **2. Materials and Methods**

### 124 *2.1 Fish and rearing conditions*

125 In February 2010, 250 Atlantic salmon parr were obtained from a wild anadromous  
126 strain originating from river Vosso in Norway. They were transported to the Aquatic  
127 Laboratory at Bergen High Technology Center and maintained in two 1m<sup>2</sup> indoor tanks  
128 with a rearing volume of 500 L supplied with flow-through fresh water at 10 l/min, pH

129 adjusted (6.9-7.1) and kept at 8°C. The fish were exposed to a simulated natural  
130 photoperiod (60°25'N) and fed a commercial dry diet (T. Skretting A/S, Stavanger,  
131 Norway) continuously during the photo-phase.

132

## 133 *2.2 Treatment Set-up*

134 On March 20<sup>th</sup> 2010, 104 pre-smolt salmon (mean weight of  $22.8 \pm 0.3$  g and mean  
135 fork length of  $12.8 \pm 0.1$  cm; randomly sampled from the original 250) were individually  
136 marked using micro PIT-tags (Nonatec<sup>TM</sup>, Lutronic International, Luxembourg) under  
137 anesthesia using 100 mg/l buffered tricaine methanosulphonate (MS222; Sigma, St.  
138 Louis, MO, USA). The fish were allowed to recover for 4 weeks before being placed into  
139 2 different treatments on April 19<sup>th</sup>; Acid-Al and control (no additional stressor). Both  
140 treatment groups consisted of 2 replicate tanks with 20 or 22 fish in each. Al  
141 ( $\text{AlCl}_3(\text{H}_2\text{O})_6$  dissolved in 24 mM HCl) and acid (1.2 M HCl) were added by peristaltic  
142 pumps continuously to one header tank and mixed with control water, creating the Acid-  
143 Al water quality. Thus, increased concentration of  $\text{AlCl}_3$  and decreased pH were the only  
144 differences between the treatments. Fish were maintained this way for the entire  
145 experiment.

146

## 147 *2.3 Water sampling and speciation of Al*

148 It was expected that some of the Al added as Al cations to the water was transformed  
149 and thus would be present in less bioavailable particulate and colloidal forms (Teien *et*

150 *al.*, 2006). To obtain information about the final distribution of Al species and the Al  
151 exposure, on April 28<sup>th</sup> both the total concentration of Al and the Al-speciation in the  
152 Acid-Al exposure and the control water were determined. The water in the tanks was  
153 fractionated with respect to size (molecular mass) and charge using *in situ* 0.45 µm  
154 membrane filtration and ultra filtration (Amicon H1P10-20 hollow fibre operating at 10-  
155 15 psi, nominal molecular mass cut-off 10 kDa) and cation chromatography (Amberlite,  
156 Teien *et al.*, 2004). Fractionated water was acidified and Al determined using inductively  
157 coupled plasma atomic emission spectrometry (ICP-AES). Thus, the concentration of  
158 different Al-species was derived and defined according to the methods applied:

- 159 • Al<sub>tot</sub> = total dissolved Al in unfiltered samples.
- 160 • Particulate Al = total concentration of Al associated with particles, *i.e.* larger than  
161 0.45 µm.
- 162 • Colloidal or HMM Al = total concentration of high molecular mass Al-species  
163 and Al associated with colloids, *i.e.* molecular mass ranging from 10 kDa-0.45  
164 µm.
- 165 • LMM Al = total concentration of low molecular mass Al-species, *i.e.* ultrafiltered  
166 (nominal molecular mass less than 10 kDa).
- 167 • LMM Al<sub>cation</sub> = cationic low molecular mass Al-species, *i.e.* ultrafiltered (nominal  
168 molecular mass less than 10 kDa), retained by Amberlite (Na form).

169 The water quality in the tanks was controlled by monitoring pH, temperature and  
170 conductivity. In addition, major cations (Ca<sup>2+</sup>, Na<sup>+</sup>, Si<sup>+</sup>, Mg<sup>2+</sup>) and anions (SO<sub>4</sub><sup>2-</sup>, Cl<sup>-</sup>, F<sup>-</sup>,  
171 NO<sub>3</sub><sup>-</sup>) were analyzed in the collected water samples (Teien *et al.*, 2004).



172 The control water quality was characterized with a pH of 6.75 and was relatively low  
173 in ionic strength (3.5 mS/m in conductivity and  $49.9 \mu\text{mol l}^{-1}$  of Ca, Table 1). In the  
174 control water the Al concentration was  $1.46 \mu\text{mol l}^{-1}$ , where 70% was present as  
175 colloidal not bioavailable Al-species (Table 2). The concentration of Al cations was less  
176 than  $0.04 \mu\text{mol l}^{-1}$  in the control water. Due to the addition of  $\text{AlCl}_3$  and acid the pH  
177 decreased to 5.7 and the concentration of Al increased from  $1.46$  to  $3.29 \mu\text{mol l}^{-1}$  in the  
178 Acid-Al exposure. This is similar to the concentration of the Al in several rivers in  
179 Norway and thus is highly relevant, with both the colloidal Al fraction being less  
180 bioavailable (Teien *et al.* 2005) and the LMM Al fraction being increased in the Acid-Al  
181 water. The concentration of LMM Al cations in the Acid-Al water was  $0.38 \pm 0.09 \mu\text{mol}$   
182  $\text{l}^{-1}$  (mean  $\pm$  S.D.).

183

#### 184 2.4 Sampling

185 Two weeks after the start of the treatment and one day prior to the behavior trials, 10  
186 fish from each treatment group were quickly dip-netted and anaesthetized in 200 mg/l  
187 MS222. Individual fish were weighed (wet weight in g) and measured (fork length in  
188 cm), and then blood was collected from the caudal vessels with heparinized tuberculin  
189 syringes. Blood was subsequently centrifuged ( $1500 \times \text{g}$ , 10 min,  $4^\circ\text{C}$ ), and plasma  
190 aliquots were frozen on dry ice. One drop of blood was used for glucose measurement  
191 (see below). One gill arch was placed in a pre-weighed scintillation vial for gill Al  
192 measurements. The day after behavior trials, another 10 fish from each treatment group  
193 were sampled following the same procedure as above. Brains were rapidly dissected and

194 immediately placed in RNAlater™ (Ambion Inc., USA) and stored at -80°C for  
195 subsequent quantification of telencephalic NeuroD1 mRNA expression. One gill arch  
196 was placed in ice-cold SEI buffer (250 mM sucrose, 10 mM EDTA, 50 mM imidazole,  
197 pH 7.3) and frozen for determination of NKA activity. Telencephalic NeuroD1 mRNA  
198 expression and NKA activity samples were taken after behavioral testing to determine  
199 how physiology and neural plasticity after the maze challenge were affected by Acid-Al.  
200 All samples were stored at -80°C until assayed.

201

#### 202 2.4.1 Gill Aluminum

203 The concentration of Al in gills (n = 10) was determined by the method of Teien *et al.*  
204 (2006), and refers to Al precipitated on the gill surface, Al incorporated in the gill cells  
205 and Al associated with mucus on gills.

206

#### 207 2.4.2 Plasma Glucose

208 Plasma glucose (mmol l<sup>-1</sup>) levels (n = 10) were determined immediately after blood  
209 collection using a portable i-STAT clinical analyser (Harrenstien *et al.*, 2005). Values  
210 were corrected for the temperature difference between ambient water temperature and the  
211 temperature-adjusted (37°C) values displayed by the instrument in accordance with the i-  
212 STAT procedure (Eliason *et al.* 2007) and ISTAT analyzer (Abbot Norge AS). Analytical  
213 cassettes of the type EC8+ were used for analyses of plasma glucose (mmol l<sup>-1</sup>).

214

215 2.4.3 Plasma Cortisol

216 Cortisol (n = 10) was measured using a RIA in a 96-well plate. All wells except the  
217 ‘non-specifics’ received 100 µl cortisol antibody (Cortisol Antibody[xm210] monoclonal  
218 and IgG purified (Abcam); 1:2000 in 50 mM NaHCO<sub>3</sub>, 50 mM NaH<sub>2</sub>CO<sub>3</sub>, 0.02% NaN<sub>3</sub>,  
219 pH 9.6) and were incubated overnight at 4°C. The following day, the plates were washed  
220 three times with 200 µl /well wash buffer (100 mM Tris, 0.9% NaCl, 0.02% NaN<sub>3</sub>).  
221 Subsequently, non-specific sites were blocked by the addition of 100 µl blocking buffer  
222 (100 mM Tris, 0.9% NaCl, 0.02% NaN<sub>3</sub>, 0.25% Normal Calf Serum) to each well. Plates  
223 were covered and incubated for one hour at 37°C. Subsequently, 10 µl of standard (4–  
224 2048 pg cortisol/10 µl assay buffer containing 100 mM Tris, 0.9% NaCl, 0.1% 8-anilino-  
225 1-naphthalenesulfonic acid, 0.02% NaN<sub>3</sub>) or 10 µl of undiluted plasma was added to  
226 designated wells. Non-specifics and B<sub>0</sub> received 10 µl assay buffer. After the addition of  
227 standards and samples, 90 µl (333 Bq) of <sup>3</sup>H-hydrocortisone (PerkinElmer, USA,  
228 1:10,000 in assay buffer) solution was added to all wells. Plates were incubated overnight  
229 at 4°C. The plates were then washed three times with wash buffer. After the final wash  
230 step, all wells received 200 µl of ‘Optiphase hisafe-3 scintillation liquid’ (PerkinElmer,  
231 USA) and were covered. Beta-emission was quantified by a 3 min count per well using a  
232 Microbeta Plus (Wallac/PerkinElmer, USA). The cortisol assay had inter and intra-assay  
233 variations of 12.5% and 3.5% respectively. The cortisol antibody had the following cross  
234 reactivities: cortisol 100%; 11-deoxycortisol 0.9%; Prednisolone 5.6%; Corticosterone  
235 0.6%; 11-Deoxycorticosterone, Progesterone, 17-Hydroxyprogesterone, Testosterone,  
236 Estradiol and Estriol all < 0.01% (Gorissen *et al.* 2012).

237

238 2.4.4 Gill NKA activity

239 Gill NKA activity (n = 10) was determined by the method of McCormick (1993).  
240 Briefly, this kinetic assay utilizes the hydrolysis of ATP, which is enzymatically coupled  
241 to the conversion of NADH to NAD<sup>+</sup> by pyruvate kinase and lactic dehydrogenase with  
242 or without the addition of ouabain, the specific inhibitor of NKA. Readings were done at  
243 340 nm for 10 min at 25°C. Protein in homogenate was determined by a bicinchoninic  
244 acid method (Smith *et al.*, 1985). The ouabain-sensitive, K<sup>+</sup>-dependent NKA specific  
245 activity is expressed in  $\mu\text{mol ADP h}^{-1}$  per mg protein.

246

247 2.4.5 RNA isolation, cDNA synthesis and real-time quantitative PCR

248 The whole brain (n = 10) was thawed in RNAlater Ice following manufacturer  
249 instructions and the telencephalon was isolated under a dissecting microscope by cutting  
250 away the olfactory bulbs and then cutting vertically between the telencephalon and the  
251 hypothalamus. Total RNA was then directly isolated from telencephalon by phenol-  
252 chloroform extraction using TRI Reagent® (Sigma, St. Louis, MO, USA) as outlined by  
253 Chomczynski (1993). Total RNA concentration and purity was determined by the  
254 NanoDrop® ND-1000 UV-Vis Spectrophotometer (NanoDrop Technologies,  
255 Wilmington, DE, USA) and the RNA integrity was evaluated with the Agilent 2100  
256 Bioanalyzer using the RNA 6000 Nano LabChip® kit (Agilent Technologies, Palo Alto,  
257 CA, USA). Total RNA was treated with TURBO DNA-free™ kit (Ambion, Austin, TX,  
258 USA) and cDNA reversely transcribed using 2 $\mu\text{g}$  total RNA and Oligo d(T<sub>15</sub>) in

259 conjunction with the SuperScript III kit (Invitrogen, Carlsbad, CA, USA) following the  
260 manufactures instructions.

261 Real-time quantitative PCR were conducted with gene specific primers in conjunction  
262 SYBR Green Master Mix (ABI; Applied Biosystems, Foster City, CA, USA) using the  
263 MJ Research Chromo 4 System Platform (Bio-Rad Laboratories Inc., CA, USA). The  
264 forward and reverse primers for salmon brain NeuroD1 (GenBank accession. number.  
265 BT058820) were: CAATGGACAGCTCCCACATCT (forward) and  
266 CCAGCGCACTTCCGTATGA (reverse). For the assays, the thermal cycling protocols  
267 contained 5  $\mu$ l cDNA (200 ng RNA), 200 nM of each primer and 12.5  $\mu$ l SYBR Green  
268 Master Mix in at total volume of 25  $\mu$ l. The thermal cycling protocol consisted of 10 min  
269 at 95°C followed by 45 cycles at 95°C for 15 seconds and 60°C for 1 min. Melt-curve  
270 analysis verified that the primer sets for each Q-PCR assay generated one single product  
271 and no primer–dimer artifacts. For each assay, triplicate two-fold cDNA dilution series  
272 made from different exposure groups were used to determine amplification efficiencies  
273 (E) calculated as the slope from the plot of log cDNA concentration versus threshold  
274 cycle (Ct) values using the following formula:  $E = 10^{(-1/\text{slope})}$ . This efficiency was used to  
275 correct for differences in amplification efficiency when calculating gene expression  
276 according to Pfaffl (2004). Expression is presented as relative to the endogenous  
277 reference gene ribosomal protein L 23 (RPL 23), which did not vary between treatments  
278 in the present study. The RPL 23 forward primer was  
279 ATGCTGCCAGCATTGAAGCAATCCT and the 23 RPL reverse primer  
280 CTTTACATCATCTCTGTCAAGGGCATCAA.

281

282 2.5 Maze Trial Procedure

283 After 15 days in the treatment tanks behavioral trials started (Control, n = 40; Acid-  
284 Al, n = 42). Learning ability was assessed using a maze that was placed inside the test  
285 tanks (similar to the holding tanks) that either contained Acid-Al treated water or control  
286 freshwater at a depth of 50 cm. Fish were tested in the same water as their home tanks;  
287 fish exposed to Acid-Al were always run in the Acid-Al conditions for the maze, and  
288 control fish were tested in control water conditions. The maze was raised up on a  
289 platform creating a water depth of 15 cm inside the maze, providing a place of shelter and  
290 shade beneath the maze. The maze consisted of a central arena that opened out to four  
291 arms that each led to a doorway (Fig. 1). There were three 'false' exits and one 'true' exit  
292 leading out into the open area in the test tank. The 'true' exit was marked with a small  
293 black circular piece of plastic (radius; 1.5 cm) attached to the wall next to the exit.

294 Fish were tested individually. Each day fish were netted out of their holding tank,  
295 scanned using a hand held PIT-tag reader for identification and then placed in a  
296 transparent start cylinder (radius; 8 cm) in the center of the maze. After 10 seconds the  
297 cylinder was lifted remotely and the fish was free to explore the maze. Trials ended after  
298 5 minutes, or when the fish escaped successfully. Once fish had left the maze they were  
299 allowed to swim freely around the exterior of the maze to help provide a potential social  
300 stimulus for fish still to be tested (although the sides of the central arena were opaque, the  
301 doorways at each of the false exits were transparent). This methodology is similar to that  
302 of Sovrano *et al.* (2002), where the motivation for fish to leave the maze was social  
303 reinstatement. As the maze was brightly illuminated, the main motivator to leave the  
304 maze was probably the aversion to bright light promoting escape into the main tank

305 where the fish could find shade and shelter underneath the maze apparatus. Testing of  
306 fish within each tank was randomized; no fish was selected as the first fish more than  
307 once across the different test trials. Fish were returned to their holding tank after all fish  
308 in that tank had been screened in the maze. No fish attempted to re-enter the maze. The  
309 maze was taken out of the tank after all the fish from a tank had been tested. This made it  
310 easier to net and remove the fish. During this stage, we also flushed the tank with clean  
311 water before the start of the next block of trials.

312 Fish were tested once per day in 2 blocks of trials; block 1: trials 1-3, followed by a 2  
313 day break and then block 2: trials 4-6. All trials were filmed using a camera positioned  
314 over the top of the test tanks. The videos were screened after the maze trials were  
315 completed and the total number of arms visited during each trial was recorded using  
316 Etholog v2.2.5 (Ottoni, 2000). All videos were analyzed with the observer blind to  
317 whether a fish was a control or Acid-AI treated fish.

318

## 319 *2.6 Statistical Analysis*

320 Data were tested for equality of variance and were transformed when there was  
321 heterogeneity of variance across the groups being compared. If data did not meet the  
322 assumptions of normality and homoscedasticity, non-parametric tests were applied.  
323 Weight and fork length, neuroD1 mRNA expression and NKA activity were compared  
324 between Acid-AI and control groups in unpaired Student's *t*-tests. Gill AI levels were  
325 Log<sub>10</sub>-transformed before these data were compared in a Student's *t*-test. Reciprocal  
326 transformation was used for the plasma glucose levels before these data were compared

327 in a Student's *t*-test. Plasma cortisol levels were compared between Acid-AI and control  
328 groups in a Mann-Whitney *U* test. For the behavioral data, there was no differences in the  
329 performance of fish in the maze from replicate tanks ( $F_{1,455} = 3.33$ ,  $P = 0.07$ ), thus tanks  
330 were pooled for behavioral analysis. The number of arms entered was square-root  
331 transformed before being compared in a repeated-measures ANOVA with treatment as a  
332 factor. The data were compared across two blocks of three trials, the first block covering  
333 trials 1-3 and the second block trials 4-6. Fish were excluded if they never learned to  
334 leave the maze and just froze during a trial without visiting any exits (excluded: 11  
335 Control, 0 Acid-AI). Freezing is not an uncommon response for salmon, and we believe  
336 that the zero value for the Acid-AI fish arises because these fish were more active. The  
337 increased activity levels exhibited by the Acid-AI fish may be due to increased levels of  
338 stress, resulting in all the Acid-AI fish visiting at least one exit. For the behavior data,  
339 variation around the mean is represented as the standard error of the mean (S.E.M.). For  
340 all other data variation around the mean is represented as the standard deviation (S.D.).  
341 All analyses were conducted in StatView (version 5.0.1) and significance was tested at  $\alpha$   
342  $< 0.05$ .

343

### 344 **3. Results**

#### 345 *3.1 Weight and Length*

346 There was no significant difference in weight (Acid-AI =  $29.6 \pm 4.3$  g, control =  $29.0$   
347  $\pm 3.5$  g; *t*-test:  $t_{1,18} = 0.36$ ,  $P = 0.72$ ) or fork length (Acid-AI =  $14.4 \pm 0.8$  cm, control =  
348  $14.2 \pm 0.6$  cm; *t*-test:  $t_{1,18} = 0.88$ ,  $P = 0.39$ ) of fish after two weeks of treatment.



349

## 350 3.2 *Physiology*

### 351 3.2.1 *Gill Al*

352 Gill Al levels were higher in the Acid-Al exposed fish compared to the control fish  
353 (Table 3, *t*-test:  $t_{1,17} = 23.04$ ,  $P < 0.01$ ).

354

### 355 3.2.2 *Plasma Glucose*

356 Fish from the Acid-Al treatment were hyperglycemic whereas those from the control  
357 treatment were not (Table 3; *t*-test:  $t_{1,18} = 3.83$ ,  $P = 0.01$ ).

358

### 359 3.2.3 *Plasma Cortisol*

360 Fish from the Acid-Al treatment had higher plasma cortisol levels than did control  
361 fish (Table 3; Mann-Whitney:  $U = 11.0$ ,  $P < 0.01$ ).

362

### 363 3.2.4 *NKA Activity*

364 Fish from the Acid-Al treatment had significantly lower NKA activity than control  
365 fish (Table 3; *t*-test:  $t_{1,18} = 5.82$ ,  $P < 0.01$ ).

366

367 *3.3 NeuroD1 mRNA*

368 Fish from the Acid-Al treatment had significantly lower neuroD1 mRNA levels  
369 (relative to RPL 23) than control fish (Fig. 2; Acid-Al =  $4.6 \pm 1.4$ , control =  $6.9 \pm 2.3$ ; *t*-  
370 test:  $t_{1,18} = 2.67$ ,  $P = 0.02$ ).

371

372 *3.4 Behavior*

373 For both the control and Acid-Al fish the average number of arms visited decreased  
374 across trials suggesting that performance improved as the fish became more experienced  
375 with the maze (ANOVA:  $F_{5,407} = 3.57$ ,  $P < 0.01$ ). Examining the behavior of the fish  
376 across the two blocks (block 1: trials 1-3 and block 2: trials 4-6) revealed a significant  
377 effect of treatment across block 2 trials with Acid-Al fish making more mistakes on  
378 average than control fish (Fig. 3; Acid-Al =  $3.6 \pm 0.3$ , control =  $2.9 \pm 0.2$ , ANOVA:  $F_{1,67}$   
379 = 4.23,  $P = 0.04$ ). There was no effect of treatment across block 1 trials (ANOVA:  $F_{1,68} =$   
380 0.03,  $P = 0.86$ ).

381

382 **4. Discussion**

383 Two weeks of exposure to Al in acidified water caused Al accumulation on the gills  
384 and impaired the spatial learning ability of smolting Atlantic salmon. The Acid-Al  
385 exposed fish made more mistakes, indicating acquisition of the task was inhibited, and  
386 had reduced neural plasticity indicators in their forebrain. Exposure to Al imposed a  
387 physiological stress, as levels of plasma glucose and cortisol increased. Together, these

388 data suggest that exposure to Al toxicity in acidified water has a negative impact on both  
389 the brain and learning behavior in salmon. Such an effect is likely to have a negative  
390 influence on the ability of the fish to cope with the transition from freshwater to the  
391 marine environment, a time when the fish need to perform critical behaviors such as  
392 predator avoidance, social interactions and navigation (McCormick *et al.*, 1998;  
393 Ebbesson and Braithwaite, 2012). Furthermore, it is possible that the reduced forebrain  
394 neural plasticity and cognitive deficit at the critical smolt stage also affect imprinting, by  
395 altering the olfactory-telencephalic plasticity associated with smoltification (Ebbesson *et*  
396 *al.*, 1996a, 2003; Folgueira *et al.*, 2004). Memories of the natal stream formed during  
397 imprinting are later used to return as adults (Hasler and Scholz 1983; Yamamoto *et al.*  
398 2010), and thus impaired imprinting could have a profound impact on return success.  
399 Such behavioral processes are likely to involve the area of the brain involved in spatial  
400 learning and memory, namely the dorsolateral (DL) area of the telencephalon (Braithwaite  
401 and Ebbesson, 2012).

402 We predicted that fish exposed to a prolonged period of elevated Al would be less  
403 accurate in the maze task than control fish. While there was an overall decrease in the  
404 number of mistakes made as the experiment progressed for fish from both groups, salmon  
405 from the Acid-Al treatment made more mistakes than control fish. It is possible that  
406 poorer learning in Acid-Al fish is linked to the observed decrease in neural plasticity, in  
407 line with a lower level of NeuroD1 mRNA expression in the telencephalon. The  
408 relationship between NeuroD1 gene expression and neurogenesis during early  
409 development has been identified in fish (Korzha *et al.* 1998; Mueller and Wullimann,  
410 2003), and it is well established that neurogenesis in the telencephalon is known to occur

411 throughout adult life in fish (Lema *et al.* 2005; Zupanc, 2008; von Krogh *et al.* 2010).  
412 The telencephalon is one of the most sensitive regions to stress induced changes in the  
413 fish brain (Sørensen *et al.*, 2011). A possible explanation for the reduced NeuroD1  
414 expression in the telencephalon of Acid-AI fish was the increased levels of stress, shown  
415 by the higher levels of plasma glucose and cortisol in this group of fish before testing in  
416 the maze. The functional consequences of stress are dependent on the magnitude and  
417 duration of the stressor but chronic stress is known to have detrimental effects on learning  
418 and memory (Conrad, 2010). Therefore, decreased neural plasticity suggested by a  
419 decrease in NeuroD1 mRNA expression may have mediated some of the observed  
420 behavioral changes.

421 Both cortisol and plasma glucose levels have been used as indicators of physiological  
422 stress in fish (Barton, 2002; Barton and Iwama, 1991; Begg and Pankhurst, 2004;  
423 Wendelaar Bonga, 1997). When cortisol is released in response to a stressful event it  
424 mobilizes fuels such as glucose to bring the fish back to homeostasis (Gregory and  
425 Wood, 1999). In the current study Acid-AI fish had higher levels of both plasma glucose  
426 and cortisol than control fish, suggesting of a higher stress level due to activation of the  
427 endocrine hypothalamic-pituitary-interrenal (HPI) axis. The effects of acidification on  
428 Atlantic salmon have been studied and similarly, it was found that low pH was strongly  
429 correlated with negative physiological effects (Liebich *et al.*, 2011). Thus in the current  
430 study, fish exposed to AI toxicity in acidic water will have experienced high allostatic  
431 load through physiological changes associated with the HPI axis, which may have led to  
432 the observed changes in learning behavior. In addition, exposure to AI toxicity lowered  
433 NKA activity in the gill. This is similar to the results of other studies in salmon that found

434 negative impacts on ion-regulatory development during smoltification (Nilsen *et al.*,  
435 2010). While Al-impairment of ion regulatory development is detrimental for a smolt and  
436 has been implicated in low rates of returning adults (Kroglund and Finstad, 2003;  
437 Monette *et al.*, 2008), recent studies have shown that ion regulatory capacity can partially  
438 recover following episodic acidification and Al exposure (Kroglund *et al.*, 2012). In the  
439 current study, the mechanisms through which Al exposure affected gill condition are  
440 unknown; Al toxicity may have acted directly on NKA activity, however, it may have  
441 acted indirectly by stimulating the HPI axis and inducing changes in NKA activity.

442 Our data showing impaired learning in Acid-Al treated fish adds a new consideration  
443 in terms of how Al toxicity in acidified water affects salmon. The effect appears to extend  
444 beyond physiological changes to also altering learning behavior. It is known that smolts  
445 have a heightened sensitivity to Al in acidified water compared with parr (Monette and  
446 McCormick 2008). In parr, many of the smolt-related parameters, such as neural  
447 plasticity, hormones, and NKA activity are at baseline levels thus making it difficult to  
448 detect impacts on them. We chose to test the fish during a significant developmental  
449 period in their life cycle because the toxicity of Al in fresh water is enhanced, potentially  
450 leading to detrimental effects later on in life. Certainly, we found effects of Al exposure  
451 in terms of increased levels of glucose and cortisol. Taken on its own, however, it is not  
452 clear whether an increase in allostatic load, brought about by altered stress physiology, is  
453 causing distress or eustress in the fish (Korte *et al.*, 2007, 2009). With the addition of our  
454 data on behavioral impairment and decreased neural plasticity, a decrease in cognitive  
455 ability suggests that the impact of Al toxicity is playing a negative role, causing distress  
456 in the exposed fish. These kinds of negative effect may have consequences for the ability

457 of smolts to imprint on their natal streams (Yamamoto *et al.* 2010); it has been  
458 established that the parr-smolt transformation is a critical period for neural development  
459 including cell differentiation and proliferation (Ebbesson *et al.*, 1996b, 2003, 2007,  
460 2011). Olfactory imprinted memory is formed during smolting and the loss of neural  
461 plasticity could therefore impair the ability of Atlantic salmon to return to their natal  
462 stream (Dittman *et al.*, 1996).

463       The negative impact of AI toxicity on cognitive ability during such a critical period  
464 has implications for how we can make management decisions for fish that are at a high  
465 risk of exposure. Further studies investigating AI toxicity effects on neural and behavioral  
466 consequences are needed to determine the breadth of these impacts. Taking the various  
467 negative effects together, salmon exposed to AI in acidic conditions appear to be forced  
468 into adapting to the adverse environment and this increases the allostatic load to a critical  
469 level. Avoiding such effects during the smolting stage could prove to be an important  
470 goal for salmon management.

471

#### 472 Acknowledgements

473       We thank Anne Aasjord and the staff at ILAB for all their help during the study. We  
474 also thank the Vosso Hatchery and Vosso Restoration project for providing the fish. The  
475 experiments were given ethical approval by the Norwegian Animal Research Authority  
476 (Reference # 1027636).

477

#### 478 Funding

479 This study was supported by the Norwegian Research Council grant number 190469  
480 (LOEE, VAB, SOS), USDA grant PEN04296 (VAB), and by European Community's  
481 Seventh Framework Programme (FP7/2010–2014) under Grant Agreement No. 265957 –  
482 COPEWELL (LOEE, GF and MG). IACUC Number: 28642.

483

#### 484 References

- 485 **Allin, C. J., Wilson, R. W.** (2000). Effects of pre-acclimation to aluminium on the  
486 physiology and swimming behaviour of juvenile rainbow trout (*Oncorhynchus mykiss*)  
487 during a pulsed exposure. *Aquat. Toxicol.* **51**, 213-224.
- 488
- 489 **Atchison, G. J., Henry, M. G., Sandheinrich, M. B.** (1987). Effects of metals on fish  
490 behavior: A review. *Environ. Biol. Fish* **18**, 11-25.
- 491
- 492 **Banasr, M., Duman, R. S.** (2007). Regulation of neurogenesis and gliogenesis by stress  
493 and antidepressant treatment. *CNS Neurol Disord Drug Targets* **6**, 1-10.
- 494
- 495 **Barton, B. A.** (2002). Stress in fishes: A diversity of responses with particular reference  
496 to changes in circulating corticosteroids. *Integr. Comp. Biol.* **42**, 517-525.
- 497
- 498 **Barton, B. A., Iwama, G. K.** (1991). Physiological changes in fish from stress in  
499 aquaculture with emphasis on the response and effects of corticosteroids. *Annu. Rev.*  
500 *Fish Dis.* 3-26.
- 501
- 502 **Begg, K., Pankhurst, N. W.** (2004). Endocrine and metabolic responses to stress in a  
503 laboratory population of the tropical damselfish *Acanthochromis polyacanthus*. *J. Fish*  
504 *Biol.* **64**, 133-145.
- 505
- 506 **Biro, P. A., Post, J. R., Booth, D. J.** (2007). Mechanisms for climate-induced mortality  
507 of fish populations in whole-lake experiments. *PNAS*, **104**, 9715-9719.
- 508
- 509 **Brady, L. D., Griffiths, R. A.** (1995). Effects of pH and Aluminum on the Growth and  
510 Feeding-Behavior of Smooth and Palmate Newt Larvae. *Ecotoxicology* **4**, 299-306.
- 511
- 512 **Braithwaite, V. A., de Perera, T. B.** (2006). Short-range orientation in fish: How fish  
513 map space. *Mar. Freshw. Behav. Phy.* **39**, 37-47.
- 514
- 515 **Brodeur, J. C., Økland, F., Finstad, B., Dixon, D. G., McKinley, R. S.** (2001). Effects  
516 of subchronic exposure to aluminium in acidic water on bioenergetics of Atlantic salmon  
517 (*Salmo salar*). *Ecotox. Environ. Safe.* **49**, 226-234.

- 518  
519 **Camargo, M. M. P., Fernandes, M. N., Martinez, C. B. R.** (2009). How aluminium  
520 exposure promotes osmoregulatory disturbances in the neotropical freshwater fish  
521 *Prochilus lineatus*. *Aquat. Toxicol.* **94**, 40-46.  
522
- 523 **Chomczynski, P.** (1993). A reagent for the single-step simultaneous isolation of RNA,  
524 DNA and proteins from cell and tissue samples. *Biotechniques* **15**, 532–537.  
525
- 526 **Conrad, C.** (2010). A critical review of chronic stress effects on spatial learning and  
527 memory. *Prog. Neuro-Psychoph.* **34**, 742-755.  
528
- 529 **Dittman, A. H., Quinn, T. P., Nevitt, G. A.** (1996). Timing of imprinting to natural and  
530 artificial odors by coho salmon, *Oncorhynchus kisutch*. *Can. J. Fish Aquat. Sci.* **53**, 434-  
531 442.  
532
- 533 **Drummond, R. A., Russom, C. L.** (1990). Behavioral toxicity syndromes: A promising  
534 tool for assessing toxicity mechanisms in juvenile fathead minnows. *Environ. Toxicol.*  
535 *Chem.* **9**, 37-46.  
536
- 537 **Dufton, C., Marcora, E., Chae, J. H. McCullough, J., Eby, J., Hausburg, M., Stein,**  
538 **G. H., Khoo, S., Cobb, M. H., Lee, J. E.** (2005). Context-dependent regulation of  
539 NeuroD activity and protein accumulation. *Mol. Cell. Neurosci.* **28**, 727– 736.  
540
- 541 **Ebbesson, L. O. E., Braithwaite, V. A.** (2012). Environmental impacts on fish neural  
542 plasticity and cognition. *J. Fish Biol.* **81**, 2151-2174.  
543
- 544 **Ebbesson, L. O. E., Deviche, P., Ebbesson, S. O. E.** (1996a). Distribution and changes  
545 in mu- and kappa-opiate receptors during the midlife neurodevelopmental period of coho  
546 salmon, *Oncorhynchus kisutch*. *J. Comp. Neurol.* **366**, 448-64.  
547
- 548 **Ebbesson, L. O. E., Ekström, P., Ebbesson, S. O. E., Stefansson, S. O., Holmqvist, B.**  
549 (2003). Neural circuits and their structural and chemical reorganization in the light-brain-  
550 pituitary axis during parr-smolt transformation in salmon. *Aquaculture* **222**, 59-70.  
551
- 552 **Ebbesson, L. O. E., Ebbesson, S. O. E., Nilsen, T. O., Stefansson, S. O., Holmqvist,**  
553 **B.** (2007). Exposure to continuous light disrupts retinal innervation of the preoptic  
554 nucleus during parr-smolt transformation in Atlantic salmon. *Aquaculture* **273**, 345-9.  
555
- 556 **Ebbesson, L. O. E., Nilsen, T. O., Helvik, J. V., Tronci, V., Stefansson, S. O.** (2011).  
557 Corticotropin-releasing factor neurogenesis during midlife development in salmon:  
558 genetic, environment and thyroid hormone regulation. *Journal Neuroendocrinol.* **23**, 733-  
559 741.  
560
- 561 **Ebbesson, S. O. E., Smith, J., Co, C., Ebbesson, L. O. E.** (1996b). Transient alterations  
562 in neurotransmitter levels during a critical period of neural development in coho salmon  
563 (*Oncorhynchus kisutch*). *Brain Res.* **742**, 339-42.



- 564  
565 **Eliason, E. J., Kiessling, A., Karlsson, A., Djordjevic, B., Farrell, A. P.** (2007).  
566 Validation of the hepatic portal vein cannulation technique using Atlantic salmon (*Salmo*  
567 *salar* L.) J. Fish Biol. **71**, 290-297.  
568
- 569 **Folgueira, M., Anadón, R., Yáñez, J.** (2004). An experimental study of the connections  
570 of the telencephalon in the rainbow trout (*Oncorhynchus mykiss*). I: Olfactory bulb and  
571 ventral area. J. Comp. Neurol. **480**, 180-203.  
572
- 573 **Gensemer, R. W., Playle, R. C.** (1999). The bioavailability and toxicity of aluminum in  
574 aquatic environments. Crit. Rev. Environ. Sci. Technol. **29**, 315-450.
- 575 **Gorissen, M., Bernier, N. J., Manuel, R., de Gelder, S., Metz, J. R., Huising, M. O.,**  
576 **Flik, G.** (2012). Recombinant human leptin attenuates stress axis activity in common  
577 carp (*Cyprinus carpio* L.). Gen. Comp. Endocrinol. **178**, 75-81.
- 578 **Gregory, T. R., Wood, C. M.** (1999). The effects of chronic plasma cortisol elevation on  
579 the feeding behaviour, growth, competitive ability, and swimming performance of  
580 juvenile rainbow trout. Physiol. Biochem. Zool. **72**, 286-295.  
581
- 582 **Guerold, F., Boudot, J. P., Jacquemin, G., Vein, D., Merlet, D., Rouiller, J.** (2000).  
583 Macroinvertebrate community loss as a result of headwater stream acidification in the  
584 Vosges Mountains (N-E France). Biodivers. Conserv. **9**, 767-783.  
585
- 586 **Hansen, L. P., Jonsson, N., Jonsson, B.** (1993). Oceanic migration in homing Atlantic  
587 salmon. Anim. Behav. **45**, 927-941.  
588
- 589 **Harrenstien, L. A., Tornquist, S. J., Miller-Morgan, T. J., Fodness, B. G., Clifford,**  
590 **K. E.** (2005). Evaluation of a point-of-care blood analyzer and determination of reference  
591 ranges for blood parameters in rockfish. J. Am. Vet. Med. Assoc. **226**, 255-265.  
592
- 593 **Hasler, A.D., Scholz, A. T.** (1983). Olfactory imprinting and homing in salmon.  
594 Zoophysiology Vol 14. New York: Springer-Verlag.  
595
- 596 **Horne, M. T., Dunson, W. A.** (1995). The Interactive Effects of Low Ph, Toxic Metals,  
597 and Doc on a Simulated Temporary Pond Community. Environ. Pollut. **89**, 155-161.  
598
- 599 **Jones, K. A., Brown, S. B., Hara, T. J.** (1987). Behavioral and biochemical studies of  
600 onset and recovery from acid stress in Arctic char (*Salvelinus alpinus*). Can. J. Fish  
601 Aquat. Sci. **44**, 373-381.  
602
- 603 **Kiefer, J. C.** (2005). Proneural factors and neurogenesis. Dev. Dynam. **234**, 808-813.  
604
- 605 **Kolb, B., Gibb, R., Robinson, T.** (2003). Brain plasticity and behavior. Curr. Dir.  
606 Psychol. Sci. **12**, 1-5.  
607

- 608 **Korte, S.M., Olivier, B., Koolhaas, J.M.** (2007). A new animal welfare concept based  
609 on allostasis. *Physiol. Behav.* **92**, 422-428.  
610
- 611 **Korte, S.M., Prins, J., Vinkers, C.H., Olivier, B.** (2009). On the origin of allostasis and  
612 stress-induced pathology in farm animals: celebrating Darwin's legacy. *Vet. J.* **182**, 378-  
613 383.  
614
- 615 **Korzh, V., Sleptsova, I., Liao, J., He, J., Gong, Z.** (1998). Expression of zebrafish  
616 bHLH genes *ngn1* and *nrd* defines distinct stages of neural differentiation. *Dev. Dyn.*,  
617 **213**, 92-104.  
618
- 619 **Kroglund, F., Finstad, B.** (2003). Low concentrations of inorganic monomeric  
620 aluminum impair physiological status and marine survival of Atlantic salmon.  
621 *Aquaculture* **222**, 119-133.  
622
- 623 **Kroglund, F., Finstad, B., Pettersen, K., Teien, H.-C., Salbu, B., Rosseland, B. O.,**  
624 **Nilsen, T. O., Stefansson, S. O., Ebbesson, L. O. E., Nilsen, R. et al.** (2012). Recovery  
625 of Atlantic salmon smolts following aluminum exposure defined by changes in blood  
626 physiology and seawater tolerance. *Aquaculture* **362-363**, 232-240.  
627
- 628 **Kroglund, F., Finstad, B., Stefansson, S. O., Nilsen, T. O., Kristensen, T., Rosseland,**  
629 **B. O., Teien, H.-C., Salbu, B.** (2007). Exposure to moderate acid water and aluminum  
630 reduces Atlantic salmon post-smolt survival. *Aquaculture* **273**, 360-373.  
631
- 632 **Kroglund, F., Rosseland, B. O., Teien, H.-C., Salbu, B., Kristensen, T., Finstad, B.**  
633 (2008). Water quality limits for Atlantic salmon (*Salmo salar* L.) exposed to short term  
634 reductions in pH and increased aluminum simulating episodes. *Hydrol. Earth Syst. Sc.*  
635 **12**, 491-507.  
636
- 637 **Leduc, A. O. H. C., Ferrari, M. C. O., Kelly, J. M., Brown, G. E.** (2004). Learning to  
638 recognize novel predators under weakly acidic conditions: the effect of reduced pH on  
639 acquired predator recognition by juvenile rainbow trout. *Chemoecology* **14**, 107-112.  
640
- 641 **Lema, S. C., Hodges, M. J., Marchetti, M. P., Nevitt, G. A.** (2005). Proliferation  
642 zones in the salmon telencephalon and evidence for environmental influence on  
643 proliferation rate. *Comp. Biochem. Physiol., A.* **141**, 327-335.  
644
- 645 **Liao, J., He, J., Yan, T., Korzh, V., Gong, Z.** (1999) A class of neuroD-related basic  
646 helix-loop-helix transcription factors expressed in developing central nervous system in  
647 zebrafish. *DNA Cell Biol.* **18**, 333-344.  
648
- 649 **Liebich, T., McCormick, S. D., Kircheis, D., Johnson, K., Regal, R., Hrabik, T.**  
650 (2011). Water chemistry and its effects on the physiology and survival of Atlantic salmon  
651 *Salmo salar* smolts. *J. Fish Biol.* **79**, 502-519.  
652

- 653 **Lovett, G. M., Tear, T. H., Evers, D. C., Findlay, S. E. G., Cosby, B. J., Dunscomb,**  
654 **J. K., Driscoll, C. T., Weathers, K. C.** (2009). Effects of Air Pollution on Ecosystems  
655 and Biological Diversity in the Eastern United States. *Ann. N. Y. Acad. Sci.* **1162**, 99-  
656 135.
- 657  
658 **MacFarlane, R. B., Livingston, R. J.** (1983). Effects of acidified water on the  
659 locomotor behavior of the Gulf killifish, *Fundulus grandis*: A time series approach. *Arch.*  
660 *Environ. Con. Tox.* **12**, 163-168.
- 661  
662 **McCormick SD.** (2001). Endocrine control of osmoregulation in fish. *Am. Zool.* **41**,  
663 781–794.
- 664  
665 **McCormick, S. D., Hansen, L. P., Quinn, T. P., Saunders, R. L.** (1998). Movement,  
666 migration, and smolting of Atlantic salmon (*Salmo salar*). *Can. J. Fish. Aquat. Sci.* **55**,  
667 77-92.
- 668  
669 **McCormick, S. D., Keyes, A., Nislow, K. H., Monette, M. Y.** (2009). Impacts of  
670 episodic acidification on in-stream survival and physiological impairment of Atlantic  
671 salmon (*Salmo salar*) smolts. *Can. J. Fish. Aquat. Sci.* **66**, 394-403.
- 672  
673 **Monette, M. Y., McCormick, S. D.** (2008). Impacts of short-term acid and aluminum  
674 exposure on Atlantic salmon (*Salmo salar*) physiology: A direct comparison of parr and  
675 smolts. *Aquat. Toxicol.* **86**, 216-226.
- 676  
677 **Monette, M. Y. Björnsson, B. Th., McCormick.** (2008). Effects of short-term acid and  
678 aluminum exposure on the parr-smolt transformation in Atlantic salmon (*Salmo salar*):  
679 Disruption of seawater tolerance and endocrine status. *Gen. Comp. Endocr.* **158**, 122-  
680 130.
- 681  
682 **Monette, M. Y., Yada, T., Matey, V., McCormick, S. D.** (2010). Physiological,  
683 molecular, and cellular mechanisms of impaired seawater tolerance following exposure  
684 of Atlantic salmon, *Salmo salar*, smolts to acid and aluminum. *Aquat. Toxicol.* **99**, 17-32.
- 685  
686 **Mueller, T., Wullimann, M. F.** (2002). BrdU-, neuroD (nrd)- and Hu-studies reveal  
687 unusual non-ventricular neurogenesis in the postembryonic zebrafish forebrain. *Mech.*  
688 *Dev.* **117**, 123-135.
- 689  
690 **Mueller, T., Wullimann, M. F.** (2003). Anatomy of neurogenesis in the early zebrafish  
691 brain. *Dev. Brain Res.*, **140**, 137-155.
- 692  
693 **Neff, K. J., Schwartz, J. S., Henry, T. B., Robinson, R. B., Moore, S. E., Kulp, M. A.**  
694 (2009). Physiological Stress in Native Southern Brook Trout During Episodic Stream  
695 Acidification in the Great Smoky Mountains National Park. *Arch. Environ. Con. Tox.* **57**,  
696 366-376.
- 697

- 698 **Neville, C. M.** (1985). Physiological response of juvenile rainbow trout, *Salmo gairdneri*,  
699 to acid and aluminum – prediction of field responses from laboratory data. *Can. J. Fish*  
700 *Aquat. Sci.* **42**, 2004-2019.  
701
- 702 **Nilsen, T. O., Ebbesson, L. O. E., Kverneland, O. G., Kroglund, F., Finstad, B.,**  
703 **Stefansson, S. O.** (2010). Effects of acidic water and aluminum exposure on gill Na<sup>+</sup>,  
704 K<sup>+</sup>-ATPase alpha-subunit isoforms, enzyme activity, physiology and return rates in  
705 Atlantic salmon (*Salmo salar* L.). *Aquat. Toxicol.* **97**, 250-259.  
706
- 707 **Odling-Smee, L. C., Boughman, J. W., Braithwaite, V. A.** (2008). Sympatric species  
708 of threespine stickleback differ in their performance in a spatial learning task. *Behav.*  
709 *Ecol. Sociobiol.* **62**, 1935-1945.  
710
- 711 **Otoni, E. B.** (2000). EthoLog 2.2: A tool for the transcription and timing of behavior  
712 observation sessions. *Behav. Res. Meth. Ins. C.* **32**, 446-449.  
713
- 714 **Øverli, Ø., Sørensen, C., Nilsson, G. E.** (2006). Behavioral indicators of stress-coping  
715 style in rainbow trout: Do males and females react differently to novelty? *Physiol.*  
716 *Behav.* **87**, 506-512.
- 717 **Parrish, D. L., Behnke, R. J., Gephard, S. R., McCormick, S. D., Reeves, G. H.**  
718 (1998). Why aren't there more Atlantic salmon (*Salmo salar*)? *Can. J. Fish Aquat. Sci.*  
719 **55**, 281-287.
- 720
- 721 **Pfaffl, M. W.** (2004). Quantification strategies in real-time PCR. In: Bustin, S. A., editor.  
722 A-Z of quantitative PCR, International University Line, San Diego, CA, USA: Chapter 3,  
723 pp. 1-23.  
724
- 725 **Scherer, E., Harrison, S. E., Brown, S. B.** (1986). Locomotor activity and blood plasma  
726 parameters of acid-exposed lake whitefish, *Coregonus clupeaformis*. *Can. J. Fish Aquat.*  
727 *Sci.* **43**, 1556-1561.  
728
- 729 **Schindler, D. W.** (1988). Effects of Acid Rain on Freshwater Ecosystems. *Science*, 239,  
730 pp. 149-157.  
731
- 732 **Shettleworth, S. J.** (2010). *Cognition, Evolution and Behavior*. 2<sup>nd</sup> ed. Oxford University  
733 Press.
- 734 **Sovrano, V. A., Bisazza, A., Vallortigara, G.** (2002). Modularity and spatial  
735 reorientation in a simple mind: encoding of geometric and nongeometric properties of a  
736 spatial environment by fish. *Cognition* **85**, B51-B59.
- 737 **Stefansson, S. O., Björnsson, B.Th., Ebbesson, L. O. E., McCormick, S. D.** (2008).  
738 Smoltification. In *Fish Larval Physiology* (Finn & Kapoor, eds.). 639-681.  
739

- 740 **Sørensen, C., Bohlin, L. C., Øverli, Ø., Nilsson, G. E.** (2011). Cortisol reduces cell  
741 proliferation in the telencephalon of rainbow trout (*Oncorhynchus mykiss*). *Physiol.*  
742 *Behav.* **102**, 518-523.
- 743 **Sørensen, C., Øverli, Ø., Summers, C. H., Nilsson, G. E.** (2007). Social regulation of  
744 neurogenesis in teleosts. *Brain Behav. Evolut.* **70**, 239-246.
- 745  
746 **Teien, H. C., Andréén, C., Kroglund, F., Salbu, B.** (2005). Changes in gill reactivity of  
747 aluminium species following liming of acid and aluminium-rich humic water. *Proc. Int.*  
748 *Assoc. Limnol.* **29**, 834-840.
- 749  
750 **Teien, H.-C., Kroglund, F., Salbu, B., Rosseland, B. O.** (2006). Gill reactivity of  
751 aluminium species following liming. *Sci. Total Environ.* **358**, 206-220.
- 752  
753 **Teien, H. C., Salbu, B., Kroglund, F., Rosseland, B. O.** (2004). Transformation of  
754 positively charged aluminium-species in unstable mixing zones following liming. *Sci.*  
755 *Total Environ.* **330**, 217-232.
- 756  
757 **von Krogh, K., Sørensen, C., Nilsson, G. E., Øverli, Ø.** (2010). Forebrain cell  
758 proliferation, behavior, and physiology of zebrafish, *Danio rerio*, kept in enriched or  
759 barren environments. *Physiol. Behav.* **101**, 32-39.
- 760 **Wendelaar Bonga, S. E.** (1997). The stress response in fish. *Physiol. Rev.* **77**, 591-625.
- 761 **Yamamoto, Y., Hino, H., Ueda, H.** (2010). Olfactory Imprinting of Amino Acids in  
762 Lacustrine Sockeye Salmon. *PLoS ONE*, **5**, e8633.
- 763 **Zupanc, G. K. H.** (2008). Adult neurogenesis and neuronal regeneration in the brain of  
764 teleost fish. *J. Physiology - Paris* **102**, 357-37
- 765

## Figure Legends

**Fig. 1.** Plan view (not drawn to scale) of the maze with test fish inside isolation tube. The maze was raised up on a platform creating a water depth of 15 cm inside the maze. Each exit (arm) was enclosed but the central arena was open. Solid lines indicate opaque walls that were used to minimize external cues, dashed lines are transparent walls.

**Fig. 2.** Relative NeuroD1 mRNA expression in the telencephalon for control and Acid-AI fish (mean  $\pm$  S.D.). \* Denotes significant difference.

**Fig. 3.** The average number of maze arms visited for control and Acid-AI fish in block 1 and block 2 of the experiment (mean  $\pm$  S.E.M.). \* Denotes significant difference.

**Fig. 1**

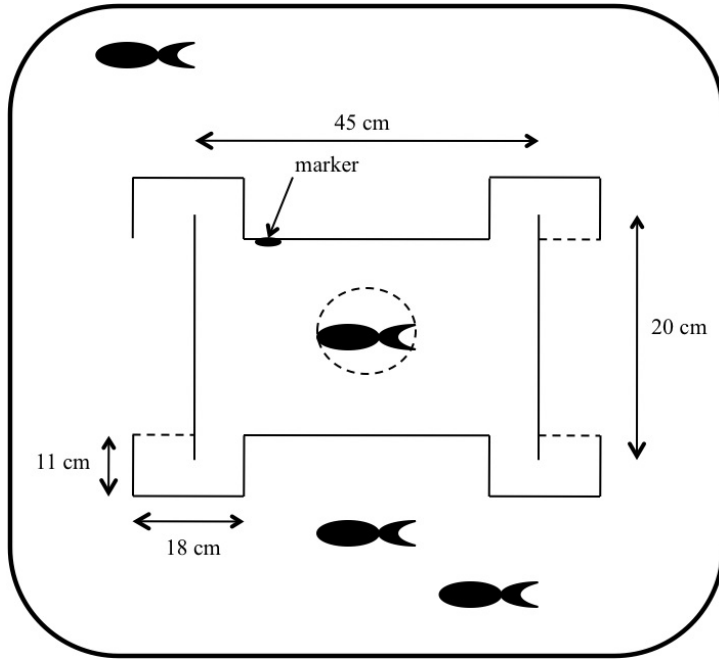

**Fig. 2**

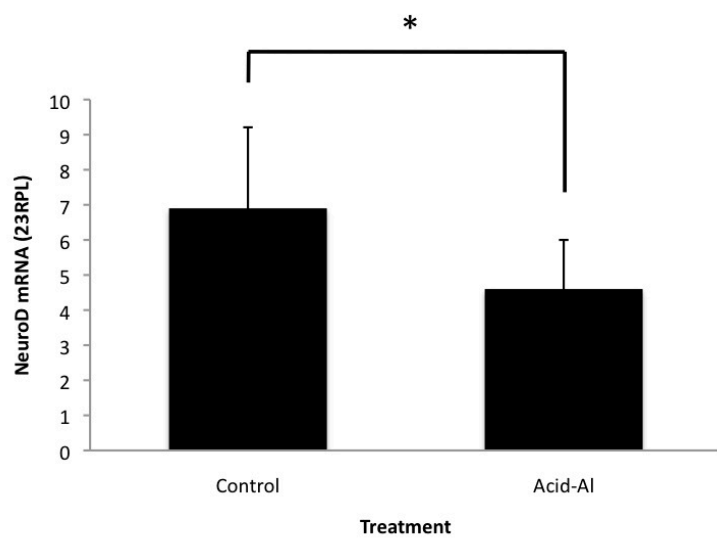



**Fig. 3**

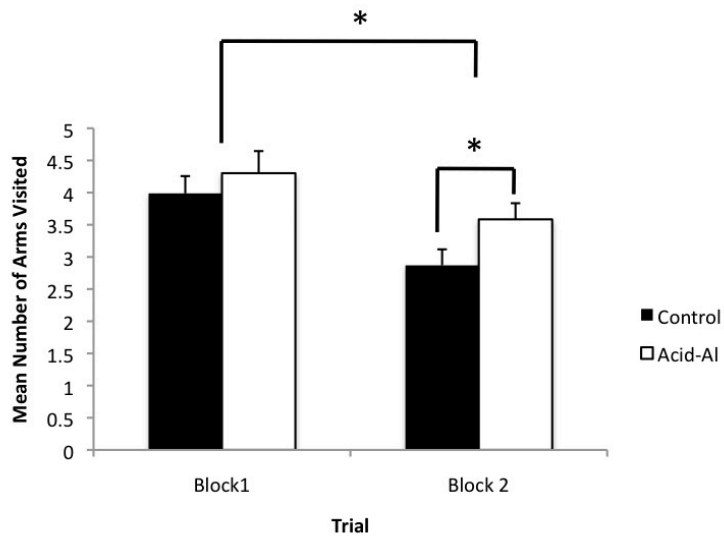

**Table 1.** Water quality in control and Acid-Al (N=3), mean  $\pm$  S.D.

|         | Temp.       | Cond.       | pH  | TOC                    | Cl <sup>-</sup>        | NO <sub>3</sub> <sup>-</sup> | SO <sub>4</sub> <sup>2-</sup> | Ca                     | K                      | Mg                     | Na                     | Si                     |               |
|---------|-------------|-------------|-----|------------------------|------------------------|------------------------------|-------------------------------|------------------------|------------------------|------------------------|------------------------|------------------------|---------------|
|         | °C          | mS/m        |     | $\mu\text{mol l}^{-1}$ | $\mu\text{mol l}^{-1}$ | $\mu\text{mol l}^{-1}$       | $\mu\text{mol l}^{-1}$        | $\mu\text{mol l}^{-1}$ | $\mu\text{mol l}^{-1}$ | $\mu\text{mol l}^{-1}$ | $\mu\text{mol l}^{-1}$ | $\mu\text{mol l}^{-1}$ |               |
| Control | 7.9 $\pm$ 0 | 3.5 $\pm$ 0 | 6.7 | 174.8 $\pm$ 16         | 155 <sup>a</sup>       | 1.61 <sup>a</sup>            | 30.18 <sup>a</sup>            | 49.9 $\pm$ 5.          | 0                      | 56.27 $\pm$ 7.7        | 16.5 $\pm$ 0           | 160.9 $\pm$ 0          | 71.2 $\pm$ 10 |
| Acid-Al | 8.1 $\pm$ 0 | 3.8 $\pm$ 0 | 5.7 | 174.8 $\pm$ 16         | 206 $\pm$ 0.0          | 1.61 $\pm$ 0                 | 29.15 $\pm$ 0                 | 47.4 $\pm$ 0           | 46.04 $\pm$ 0          | 16.5 $\pm$ 0           | 160.9 $\pm$ 0          | 78.3 $\pm$ 0           |               |

<sup>a</sup>N=1

**Table 2.** Water concentrations of different Al-fractions in control and Acid-Al, (N= 3-6), mean  $\pm$  S.D.

|         | Al tot<br>$\mu\text{mol l}^{-1}$ | Particulate Al<br>$\mu\text{mol l}^{-1}$ | Colloidal Al<br>$\mu\text{mol l}^{-1}$ | LMM Al<br>$\mu\text{mol l}^{-1}$ | LMM Al-cations<br>$\mu\text{mol l}^{-1}$ |
|---------|----------------------------------|------------------------------------------|----------------------------------------|----------------------------------|------------------------------------------|
| Control | 1.46 $\pm$ 0.01                  | 0.03 $\pm$ 0.02                          | 1.03 $\pm$ 0.06                        | 0.40 $\pm$ 0.05                  | <0.04                                    |
| Acid-Al | 3.29 $\pm$ 0.10                  | 0.03 $\pm$ 0.08                          | 1.96 $\pm$ 0.17                        | 1.33 $\pm$ 0.13                  | 0.38 $\pm$ 0.09                          |

**Table 3.** Summary of physiological parameters in control and Acid-AI fish. All values are reported as mean  $\pm$  S.D. excluding the plasma cortisol levels which are median values.

| Physiological Parameters                                       | Control         | Acid-AI         | p-value |
|----------------------------------------------------------------|-----------------|-----------------|---------|
| Gill AI ( $\mu\text{mol g}^{-1}$ dry weight)                   | $0.11 \pm 0.01$ | $2.00 \pm 0.15$ | <0.01   |
| Gill NKA activity ( $\mu\text{mol ADP h}^{-1}$ per mg protein) | $14.6 \pm 1.6$  | $9.3 \pm 2.4$   | <0.01   |
| Plasma glucose ( $\text{mmol l}^{-1}$ )                        | $5.3 \pm 0.5$   | $7.7 \pm 2.8$   | 0.01    |
| Plasma cortisol ( $\text{ng ml}^{-1}$ )                        | 14.5            | 43.0            | <0.01   |
